# Supplementary material for: Augmented re-endothelialization and anti-inflammation of coronary drug-eluting stent by abluminal coating with magnesium hydroxide
Source: Royal Society of Chemistry journal article supplement (doi:10.1039/c8bm01696h), 2019-01-01
Supplement: c8bm01696h1.pdf [file c8bm01696h1.pdf]

*Supporting Information for*

# **Augmented Re-endothelialization and Anti-Inflammation of Coronary Drug-Eluting Stent by Abluminal Coating with Magnesium Hydroxide**

*Da-Won Jeong,<sup>1,2,†</sup> Wooram Park,<sup>1,†</sup> Tarek M. Bedair,<sup>1,3</sup> Eun Young Kang,<sup>1,4</sup> Ik Hwan Kim,<sup>4</sup>  
Dae Sung Park,<sup>5</sup> Doo Sun Sim,<sup>5</sup> Young Joon Hong,<sup>5</sup> Won-Gun Koh,<sup>2</sup> Myung Ho Jeong,<sup>5</sup>  
and Dong Keun Han<sup>1,\*</sup>*

<sup>1</sup>Department of Biomedical Science, CHA University, 335 Pangyo-ro, Bundang-gu, Seongnam, Gyeonggi, 13488, Republic of Korea

<sup>2</sup>Department of Chemical and Biomolecular Engineering, Yonsei University, 50 Yonsei-ro, Seodaemun-gu, Seoul, 03722, Republic of Korea

<sup>3</sup>Chemistry Department, Faculty of Science, Minia University, El-Minia 61519, Egypt

<sup>4</sup>College of Life Sciences Biotechnology, Korea University, 145 Anam-ro, Seongbuk-gu, Seoul 02841, Republic of Korea

<sup>5</sup>The Heart Center of Chonnam National University Hospital, 42 Jaebongro, Dong-gu, Gwangju 61469, Republic of Korea

†These authors equally contributed to this work.

\*Corresponding Authors: D. K. H. (dkhan@cha.ac.kr)

## Experimental method for Supporting Information

***Coating stability test under balloon dilatation:*** The stability of the PLGA/SRL/MH coating on a stent in the ballooning process was tested with the balloon dilatation test. PLGA/SRL or PLGA/SRL/MH-coated stent was mounted onto an angioplasty balloon using a stent crimper. The balloon was dilated at a pressure of 8 ~ 10 psi for 10 seconds. Surface morphology of the post-expansion stent was observed by SEM (Phenom Pro Desktop SEM, Phenom-world BV, Eindhoven, The Netherlands).

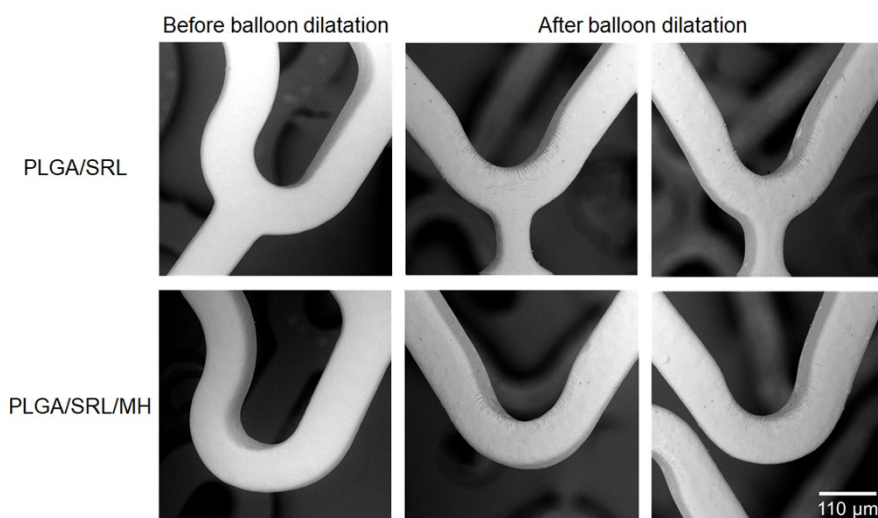

**Figure S1.** Scanning electron microscopy (SEM) images of surface morphology of PLGA/SRL and PLGA/SRL/MH coating layer before and after balloon dilatation (scale bar, 110 μm).

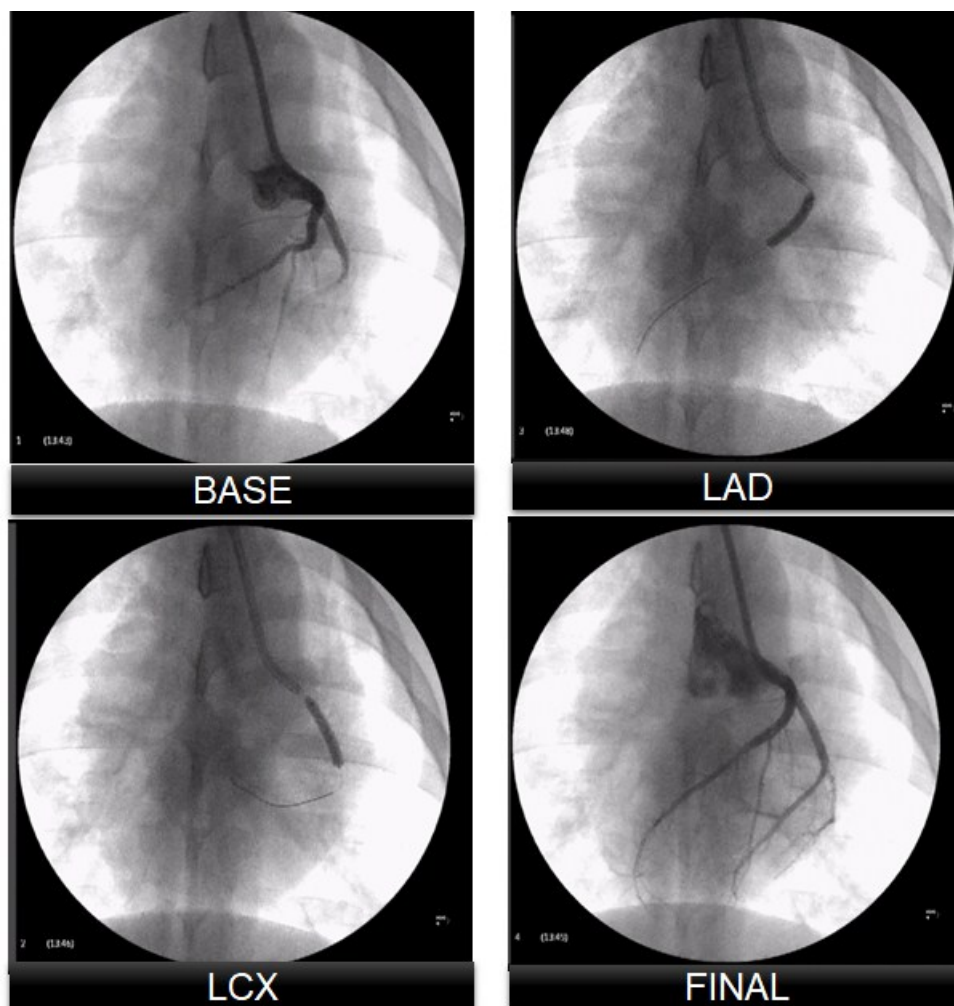

**Figure S2.** *In vivo* X-ray angiography image in the PLGA/SRL/MH-coated stent insertion procedure in porcine animal model. The stent was successfully imaged in the cardiovascular system when left anterior descending (LAD) and left circumflex coronary artery (LCX) imaging were performed during the stent insertion procedure. Finally, the vessel was successfully opened after the stenting procedure.
